# Supplementary material for: Characterization of a Novel Cotton Subtilase Gene GbSBT1 in Response to Extracellular Stimulations and Its Role in Verticillium Resistance
Source: PubMed Central journal article supplement (PMC4835097; doi:10.1371/journal.pone.0153988), 2016-04-18
Supplement: pone.0153988.s003.pdf [file pone.0153988.s003.pdf]

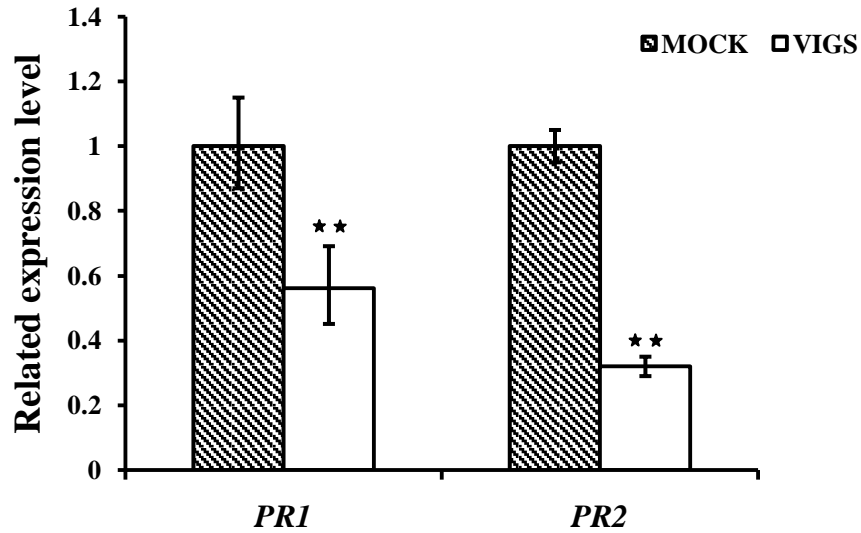

Supplementary Figure 3. qPCR analyses of *PR1* and *PR2* expression in *Gossypium babardense* (Pima-90) and its VIGS plants 10 days after *V. dahliae* strain V991 inoculation. Gene expression levels were normalized to the constitutive *Ubiquitin* gene expression. The expression levels are the means with SD; n = 3 replicates. dpi: days post-inoculation. Double asterisks represent a very significant difference between VIGS plants and wild-type plants ( $P < 0.01$ ) in t-test.
